# Supplementary material
Source: PubMed Central journal article supplement (PMC3993519)
Supplement: JCM.03489-13_zjm999093263so1.pdf [file JCM.03489-13_zjm999093263so1.pdf]

---

**Table S1 ITS rRNA identifications for isolates included within the validation study**

---

| <b>ITS rRNA identification</b>  | <b>(n)</b> |
|---------------------------------|------------|
| <i>Candida parapsilosis</i>     | 56         |
| <i>Candida albicans</i>         | 50         |
| <i>Candida glabrata</i>         | 28         |
| <i>Candida tropicalis</i>       | 12         |
| <i>Candida guilliermondii</i>   | 12         |
| <i>Candida krusei</i>           | 9          |
| <i>Candida kefyr</i>            | 3          |
| <i>Candida lusitaniae</i>       | 3          |
| <i>Meyerozyma caribbica</i>     | 3          |
| <i>Candida orthopsilosis</i>    | 2          |
| <i>Saccharomyces cerevisiae</i> | 2          |
| <i>Pichia fermentans</i>        | 2          |
| <i>Candida lipolytica</i>       | 1          |
| <i>Cryptococcus neoformans</i>  | 1          |
| <i>Candida nivariensis</i>      | 1          |
| <i>Pichia cactophila</i>        | 1          |
| <i>Candida dubliniensis</i>     | 1          |
| <i>Magnusiomyces capitatus</i>  | 1          |
| <i>Cyberlindnera fabianii</i>   | 1          |
| <i>Debaryomyces nepalensis</i>  | 1          |
| Total                           | 190        |

---
